# Supplementary material for: Compounding of Liquid and Solid Dose Adjustable Formulations with Pantoprazole: Comparison of Stability, Applicability and Suitability
Source: MDPI journal article supplement (doi:10.3390/pharmaceutics15030717), 2023-02-21
Supplement: s1 [file s1]

# SUPPLEMENTARY MATERIALS

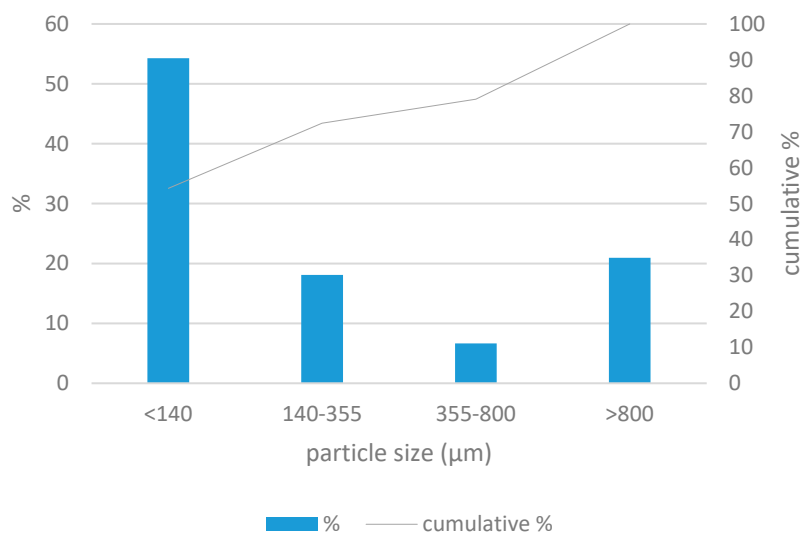

**Figure S1.** Particle size distribution of crashed tablets (crashing method mortar and pestle).

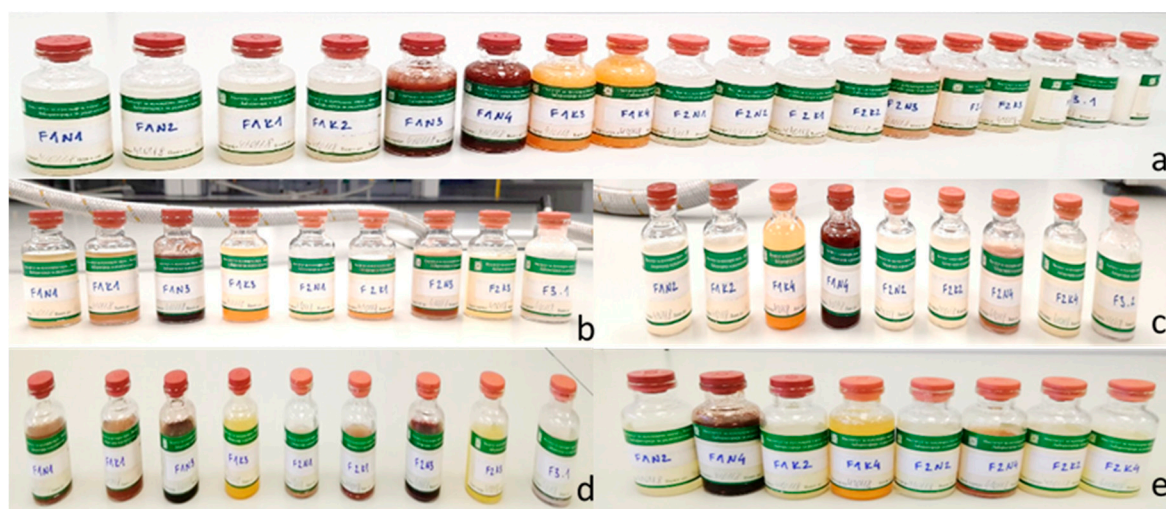

**Figure S2.** Color of prepared pantoprazole formulations a) 0 day all formulations, b) 7 days formulations kept on room temperature, c) 7 days formulations kept in refrigerator, d) 28 days formulations kept at room temperature and e) 28 days formulations kept in refrigerator

**Table S1.** Comparison of pantoprazole content (%) in prepared formulations 0 vs 7 days and 0 vs 28 days.

| fromulation | p values |         |
|-------------|----------|---------|
|             | 0 vs 7   | 0 vs 28 |
| F1N1        | 0.020    | 0.000   |
| F1N2        | 0.900    | 0.250   |
| F1K1        | 0.797    | 0.004   |
| F1K2        | 0.419    | 0.012   |
| F1N3        | 0.000    | 0.000   |
| F1N4        | 0.000    | 0.000   |
| F1K3        | 0.000    | 0.000   |
| F1K4        | 0.000    | 0.000   |
| F2N1        | 0.000    | 0.000   |
| F2N2        | 0.050    | 0.015   |
| F2K1        | 0.000    | 0.000   |
| F2K2        | 0.001    | 0.000   |
| F2N3        | 0.000    | 0.000   |
| F2N4        | 0.003    | 0.000   |
| F2K3        | 0.000    | 0.000   |
| F2K4        | 0.000    | 0.000   |
| F3.1        | 0.720    | 0.180   |
| F3.2        | 0.247    | 0.024   |

**Table S2.** Comparison of pantoprazole content (%) in prepared formulations F1N1, F2N2, F31 and F32 in 0, 7 and 28 days (Student T test,  $p < 0.05$  statistical significance).

| days        | 0     |       |       |       | 7     |       |       |       | 28    |       |       |       |
|-------------|-------|-------|-------|-------|-------|-------|-------|-------|-------|-------|-------|-------|
| fromulation | F1N2  | F2N2  | F31   | F32   | F1N2  | F2N2  | F31   | F32   | F1N2  | F2N2  | F31   | F32   |
| F1N2        | /     | 0.999 | 0.537 | 0.537 | /     | 1.000 | 1.000 | 1.000 | /     | 1.000 | 1.000 | 1.000 |
| F2N2        | 0.999 | /     | 0.999 | 0.999 | 1.000 | /     | 1.000 | 0.998 | 1.000 | /     | 1.000 | 1.000 |
| F31         | 0.537 | 0.999 | /     | 1.000 | 1.000 | 1.000 | /     | 1.000 | 1.000 | 1.000 | /     | 1.000 |

**Table S3.** Dissolution profiles comparison between F4, F5 and F6 in medium pH 6.8 (referent formulations) and dissolution profiles in mediums after addition apple juice and chamomile tea (test formulations) using model-independent method

| Excipients | Apple juice |    | Cmamomile tea |    |
|------------|-------------|----|---------------|----|
|            | f1          | f2 | f1            | f2 |
| F4         | 11          | 43 | 3             | 75 |
| F5         | 6           | 63 | 23            | 26 |
| F6         | 26          | 42 | 14            | 51 |

\*Profiles are similar if  $f1 < 15$  and  $f2$  is between 50 and 100.

**Table S4.** Dissolution profiles comparison between F4 (capsules with LAC as referent formulation) and F5/F6 (test formulations) in different dissolution mediums using model-independent method

| Dissolution medium | F5 |    | F6 |    |
|--------------------|----|----|----|----|
|                    | f1 | f2 | f1 | f2 |
| pH 6,8             | 6  | 44 | 30 | 26 |
| Apple juice        | 14 | 38 | 15 | 42 |
| Chamomile tea      | 18 | 30 | 37 | 23 |

\*Profiles are similar if  $f1 < 15$  and  $f2$  is between 50 and 100. Profiles between F5 and F6 are differenced in all three mediums ( $f1 = 33, 25, 46$ , and  $f2 = 26, 29, 17$  in pH 6.8, apple juice and chamomile tea respectively)
